# Supplementary material for: Yin-dan-ping-gan Capsule mitigates CCL 4 -induced liver fibrosis via activating PPAR γ/GPX4 signaling and suppressing ferroptosis
Source: Research Square preprint supplement (doi:10.21203/rs.3.rs-6978349/v1), 2025-07-10
Supplement: Supplementary file 1 [file 60f653b3609b1b6a771baf5a.docx]

**Table S3** The antibody for western blotting

| **Antibody** | **CAT** | **Brand** | **Dilution** |
| --- | --- | --- | --- |
| Slc3a2 | HY-P82453 | MedChemExpress | 1:1000 |
| Slc7a11 | HY-P80935 | MedChemExpress | 1:1000 |
| Nrf2 | HY-P81051 | MedChemExpress | 1:1000 |
| PPAR-γ | HY-P80436 | MedChemExpress | 1:1000 |
| CD36 | HY-P81793 | MedChemExpress | 1:1000 |
| GPX4 | HY-P80450 | MedChemExpress | 1:1000 |
| Keap1 | HY-P80732 | MedChemExpress | 1:1000 |
| GADPH | HY-P2804 | MedChemExpress | 1:5000 |
| HO-1 | YP-Ab-04799 | UpingBio technology | 1:1000 |
